# Supplementary material for: A persistent diagnostic gap: awareness and workup of bleeding disorders in heavy menstrual bleeding among Dutch gynecologists and hematologists
Source: Research Square preprint supplement (doi:10.21203/rs.3.rs-8310699/v1), 2026-01-12
Supplement: Supplementary file 1 [file 0bc8d76a406f646f0dca6f83.docx]

**Supplementary data**

Heavy menstrual bleeding and awareness for bleeding disorders, screening and analysis by gynecologists

**Introduction**

Dear Colleague,

Through this questionnaire, we aim to evaluate the daily practice in the management of heavy menstrual bleeding (HMB). Our focus is awareness for bleeding disorders in HMB. The goal of this questionnaire is to gather an overview of current practices and map any variations. A scientific article will be written based on the results.

All data will be processed completely anonymously. The questionnaire consists of three sections: 1) general questions, 2) questions regarding the logistics of HMB management in your hospital, and 3) questions related to the analysis of HMB with specific emphasis on attention to underlying bleeding disorders.

We aim for a high response rate. We kindly request that you share this questionnaire as widely as possible and encourage your colleagues to participate.

The estimated time to complete the questionnaire is 10-15 minutes. The responses will be automatically saved throughout the process. If you have any questions, please feel free to email them to silvia.luijten@mmc.nl.

Thank you in advance for your cooperation,
Silvia Luijten, MSc (PhD researcher, Nurse practitioner, Máxima Medical Center),
dr. Laurens Nieuwenhuizen (Hematologist, Máxima Medical Center),
prof. dr. Marlies Bongers (Gynecologist, Máxima Medical Center)

Q1 What is your function?

- Gynecologist
- Medical resident
- Other, namely: __________________________________________________

Q2 Do you work in an mProve hospital? (Albert Schweitzer Hospital, Isala, Jeroen Bosch Hospital, Máxima MC, Noordwest Hospital, Rijnstate, Zuyderland)

- Yes
- No

Q3 In what kind of gynecology center do you wok?

- Academical center
- Independent treatment center
- General teaching hospital
- General non-teaching hospital

Q4 In which sub-specialism do you work? innen welk sub-specialisme werkt u? (multiple options possible)

- Benign gynecology
- Obstetrics
- Fertility
- Urogynecology
- Oncological gynecology

Start part 2: logistics HMB

Q5 Do you see patients with heavy menstrual bleeding?

- Yes, often
- No, almost never

Q6 Does your hospital have a special “heavy menstrual bleeding” clinic?

- Yes
- No

Show this question if:

Does your hospital have a special “heavy menstrual bleeding” clinic? = Yes

Q6a If yes: Which diagnostics and treatments can be performed immediately during this consultations? (multiple options possible)

- Trans-vaginal echo
- SIS/GIS-echo
- Hysteroscopy
- Intra-uterine device
- Therapeutical hysteroscopy
- Endometriumablation

Q7 Do you have a multidisciplinary team meeting about bleeding disorders?

- Yes
- No

Show this question if:

Do you have a multidisciplinary team meeting about bleeding disorders?= Yes

Q7a If yes, are patients with heavy menstrual bleeding discussed in this multidisciplinary team meeting about bleeding disorders?

- Yes
- No

Show this question if:

Do you have a multidisciplinary team meeting about bleeding disorders?= Yes

Q7b If yes, who participate in this multidisciplinary team meeting about bleeding disorders? (multiple options possible)

- Gynecologist
- Medical resident
- Internist/Hematologist/Vascular specialist
- Clinical chemist
- Physician assistant / Nurse specialist
- Nurse
- Other, namely: __________________________________________________

Q8 Does your patient receive a questionnaire before visit?

- Yes
- No

Show this question if:

Does your patient recieve a questionnaire before visit? = Yes

Q8a If yes; which questionnaire? (Multiple options possible)

- PBAC (pictural blood loss assessment chart)
- Menstruation calendar
- ISTH-BAT (bleeding assesment tool)
- Self-BAT (bleeding assesment tool)
- Self-developed questionnaire
- Other, namely: __________________________________________________

Q9 Do you use the consultation card “Heavy blood loss in your period”?

- Yes
- No

Q10 Do you advise to use the decision aid “Heavy menstrual bleeding”?

- Ja (1)
- Nee (2)

End part 2: Logistics in heavy menstrual bleeding

Start part 3: Analysis heavy menstrual bleeding

Q11 Do you ask if heavy menstrual bleeding exists since menarche?

- Yes
- No

Q12 Do you ask about bleeding history?

- Never
- Seldom
- Regularly
- Often
- Always

Q13 Do you ask about family history in the context of bleeding disorders?

- Never
- Seldom
- Regularly
- Often
- Always

Q14 Do you use the bleeding score ISTH BAT?

- Never
- Seldom
- Regularly
- Often
- Always

Q15 Do you use laboratory testing in the context of bleeding disorders in heavy menstrual bleeding?

- Never
- Seldom
- Regularly
- Often
- Always

Q16 Do you use a fixed set of laboratory tests for analysis?

- Yes
- No

Q17 Which laboratory tests do you use in the first step? (multiple options possible)

- Hemoglobin/hematocrit
- Platelet count
- Ferritin
- Transferrin
- Prothrombin time
- Activated partial thromboplastin time
- Platelet function analyser
- Thrombin time
- Fibrinogen
- von Willebrand activity
- von Willebrand antigen
- Factor VIII
- Factor IX
- Trombocyt aggregation tests
- Other, namely: __________________________________________________

Q18 Do you refer women with heavy menstrual bleeding to a hematologist?

- Never
- Seldom
- Regularly
- Often
- Always

Q19 How often do you think that an underlying bleeding disorder has a role in the cause of heavy menstrual bleeding?

- <5%
- 5-15%
- 15-30%
- 30-50%
- >50%

Q20 Is the Dutch Guideline from the Dutch Association of Obstetrics and Gynecology “Heavy menstrual bleeding” providing enough information about the background and diagnostics of an underlying bleeding disorder?

- Yes
- No

Q21 Last question: do you ask this items?

|  | Never | Seldom | Regularly | Often | Always |
| --- | --- | --- | --- | --- | --- |
| Nosebleeds |  |  |  |  |  |
| Cutaneous bruising |  |  |  |  |  |
| Bleeding from minor wounds |  |  |  |  |  |
| Oral cavity bleeding |  |  |  |  |  |
| Gastro-intestinal bleeding |  |  |  |  |  |
| Hematuria |  |  |  |  |  |
| Dental extractions |  |  |  |  |  |
| Bleeding from survery |  |  |  |  |  |
| Menorrhagia |  |  |  |  |  |
| Post-partum hemorrage |  |  |  |  |  |
| Muscle hematomas |  |  |  |  |  |
| Hemarthrosis |  |  |  |  |  |
| Central nerve system bleeding |  |  |  |  |  |
| Other bleeding problems |  |  |  |  |  |

Q22 Do you have any questions or suggestions?

________________________________________________________________

Q23 Thank you for your cooperation. This is the end of the questionnaire. If you click now, the questionnaire will be automatically saved and closed. In the case of other questions and/or suggestions you can mail through silvia.luijten@mmc.nl

With this link you can share the questionnaire with you colleagues:
https://maastrichtuniversity.eu.qualtrics.com/jfe/form/SV_efFGi3itQNGWdoi

**End of part 3: Analysis of heavy menstrual bleeding**

Heavy menstrual bleeding and awareness for bleeding disorders, screening and analysis by hematologists

**Introduction**

Dear Colleague,

Through this questionnaire, we aim to evaluate the daily practice in the management of heavy menstrual bleeding (HMB). Our focus is awareness for bleeding disorders in HMB. The goal of this questionnaire is to gather an overview of current practices and map any variations. A scientific article will be written based on the results.

All data will be processed completely anonymously. The questionnaire consists of three sections: 1) general questions, 2) questions regarding the logistics of HMB management in your hospital, and 3) questions related to the analysis of HMB with specific emphasis on attention to underlying bleeding disorders.

We aim for a high response rate. We kindly request that you share this questionnaire as widely as possible and encourage your colleagues to participate.

The estimated time to complete the questionnaire is 10-15 minutes. The responses will be automatically saved throughout the process. If you have any questions, please feel free to email them to silvia.luijten@mmc.nl.

Thank you in advance for your cooperation,
Silvia Luijten, MSc (PhD researcher, Nurse practitioner, Máxima Medical Center),
dr. Laurens Nieuwenhuizen (Hematologist, Máxima Medical Center),
prof. dr. Marlies Bongers (Gynecologist, Máxima Medical Center)

Q1 What is your function?

- Internist
- Hematologist
- Vascular specialist
- Medical resident
- Other, namely: __________________________________________________

Q2 Do you work in a hemophilia treatment center?

- Yes
- No

Q3 In what kind of hematological center do you work?

- Academical center
- General teaching hospital
- General non-teaching hospital

Q4 Do you work in an mProve hospital? (Albert Schweitzer Hospital, Isala, Jeroen Bosch Hospital, Máxima MC, Noordwest Hospital, Rijnstate, Zuyderland)

- Yes
- No

End of part 1: general information

Start of part 2: Logistics in heavy menstrual bleeding

Q5 Do you see patients with heavy menstrual bleeding?

- Yes, often
- No, almost never

Q6 Does your hospital have a special “heavy menstrual bleeding” clinic?

- Yes
- No

Q7 Do you have a multidisciplinary team meeting about bleeding disorders?

- Yes
- No

Show this question if:

Do you have a multidisciplinary team meeting about bleeding disorders? = Yes

Q7a If yes, are patients with heavy menstrual bleeding discussed in this multidisciplinary team meeting about bleeding disorders?

- Yes
- No

Show this question if:

Do you have a multidisciplinary team meeting about bleeding disorders? = Yes

Q7b If yes, who participate in this multidisciplinary team meeting about bleeding disorders? (multiple options possible)

- Gynecologist
- Medical resident
- Internist/Hematologist/Vascular specialist
- Clinical chemist
- Physician assistant / Nurse specialist
- Nurse
- Other, namely: __________________________________________________

Q8 Does your patient receive a questionnaire before visit?

- Yes
- No

Show this question if:

Does your patient recieve a questionnaire before visit? = Yes

Q8a If yes; which questionnaire? (Multiple options possible)

- PBAC (pictural blood loss assessment chart)
- Menstruation calendar
- ISTH-BAT (bleeding assesment tool)
- Self-BAT (bleeding assesment tool)
- Self-developed questionnaire
- Other, namely: __________________________________________________

End part 2: Logistics in heavy menstrual bleeding

Start part 3: Analysis heavy menstrual bleeding

Q9 What do you consider as abnormal, heavy menstrual bleeding? (multiple options possible)

- Menstruation lasting >7 days
- Changing pads/tampons more than every 2 hours
- Loss of clots
- PBAC score >100 (pictural blood loss assessment chart)
- Absence of work/school
- Hormonal therapy due to heavy menstrual bleeding
- Iron deficiency anemia
- Need for iron supplementation
- Need for blood transfusion

Q10 Do you ask if heavy menstrual bleeding exists since menarche?

- Never
- Seldom
- Regularly
- Often
- Always

Q11 Do you ask about bleeding history?

- Never
- Seldom
- Regularly
- Often
- Always

Q12 Do you ask about family history in the context of bleeding disorders?

- Never
- Seldom
- Regularly
- Often
- Always

Q13 Do you use the bleeding score ISTH BAT?

- Never
- Seldom
- Regularly
- Often
- Always

Q14 Do you use laboratory testing in the context of bleeding disorders in heavy menstrual bleeding?

- Never
- Seldom
- Regularly
- Often
- Always

Q15 Do you use a fixed set of laboratory tests for analysis?

- Yes
- No

Q16 Which laboratory tests do you use in the first step? (multiple options possible)

- Hemoglobin/hematocrit
- Platelet count
- Ferritin
- Transferrin
- Prothrombin time
- Activated partial thromboplastin time
- Platelet function analyser
- Thrombin time
- Fibrinogen
- von Willebrand activity
- von Willebrand antigen
- Factor VIII
- Factor IX
- Trombocyt aggregation tests
- Other, namely: __________________________________________________

Q17 How often do you think that an underlying bleeding disorder has a role in the cause of heavy menstrual bleeding?

- <5%
- 5-15%
- 15-30%
- 30-50%
- >50%

Q18 Last question: do you ask this items?

|  | Never | Seldom | Regularly | Often | Always |
| --- | --- | --- | --- | --- | --- |
| Nosebleeds |  |  |  |  |  |
| Cutaneous bruising |  |  |  |  |  |
| Bleeding from minor wounds |  |  |  |  |  |
| Oral cavity bleeding |  |  |  |  |  |
| Gastro-intestinal bleeding |  |  |  |  |  |
| Hematuria |  |  |  |  |  |
| Dental extractions |  |  |  |  |  |
| Bleeding from survery |  |  |  |  |  |
| Menorrhagia |  |  |  |  |  |
| Post-partum hemorrage |  |  |  |  |  |
| Muscle hematomas |  |  |  |  |  |
| Hemarthrosis |  |  |  |  |  |
| Central nerve system bleeding |  |  |  |  |  |
| Other bleeding problems |  |  |  |  |  |

Q19 Do you have any questions or suggestions?

________________________________________________________________

Q20 Thank you for your cooperation. This is the end of the questionnaire. If you click now, the questionnaire will be automatically saved and closed. In the case of other questions and/or suggestions you can mail through silvia.luijten@mmc.nl

With this link you can share the questionnaire with you colleagues:
https://maastrichtuniversity.eu.qualtrics.com/jfe/form/SV_efFGi3itQNGWdoi

End of part 3: Analysis of heavy menstrual bleeding
